# Supplementary material for: Assembling and de-assembling micelles: competitive interactions of cyclodextrins and drugs with Pluronics
Source: Royal Society of Chemistry journal article supplement (doi:10.1039/b812805g), 2009-01-01
Supplement: b812805g.pdf [file b812805g.pdf]

### Electronic Supplementary Information

#### Fourier Transform Infrared spectroscopy (FTIR)

Fourier transform infrared spectra were recorded in the absorbance mode between 600 and 4000  $\text{cm}^{-1}$  on a Perkin Elmer spectrometer. The samples were thoroughly dried by centrifugation under vacuum and heating. Several measurements were carried out and compared for reproducibility.

All experiments were carried out at room temperature, and since the complexation between the polymer and the cyclodextrins is a kinetic process, sufficient time was allowed before each measurement to ensure that complexation had taken place.

FTIR was used in addition to SANS and WAXS in order to detect the formation or otherwise of an inclusion complex and identify differences in behaviour between hep2,6- $\beta$ CD and hep2,3,6- $\beta$ CD. He- $\beta$ CD and hp- $\beta$ CD were not used in this section since their structure is not as well defined and their IR signal not 'neat' enough to be able to monitor possible changes occurring upon complexation.

Samples were made in  $\text{D}_2\text{O}$  and sufficient time was allowed before drying in order to ensure full H-D exchange of the OH group of hep2,6- $\beta$ CD. This exchange was made in order to clearly identify the band corresponding to the C-O-D stretching mode. Monitoring any changes in this specific region of the molecule is highly important as it is believed to be key to the complexation mechanism with F127. The comparative spectra in  $\text{D}_2\text{O}$  and  $\text{H}_2\text{O}$ , reproduced in **Fig. 1**, show the presence of an extra peak for the cyclodextrin dissolved in  $\text{D}_2\text{O}$  as expected. The FTIR spectra of hep2,3,6- $\beta$ CD, both in  $\text{D}_2\text{O}$  and  $\text{H}_2\text{O}$ , are obviously identical (not shown here).

**Fig. 2a and b** show the FTIR spectra of solutions of 5 wt% hep2,6- $\beta$ CD and hep2,3,6- $\beta$ CD, respectively, with increasing amounts of F127 (1 to 9 wt%). With 1 wt% F127, the PO/  $\beta$ CD ratio is ca 1.4, i.e. above the ratio for full complexation and the IR spectrum corresponds quite closely to that obtained from pure cyclodextrin (both for hep2,6- $\beta$ CD and hep2,3,6- $\beta$ CD). Upon addition of increasing amounts of polymer, the signal shifts slightly to show the characteristic bands of F127. For instance, the hep2,6- $\beta$ CD band at 965  $\text{cm}^{-1}$ , visible in the sample with 1 wt% polymer, gradually shifts to 960  $\text{cm}^{-1}$  (characteristic peak of F127). This is also particularly clear in the 1200-1500  $\text{cm}^{-1}$  region (inset of **Fig. 2a**): with increasing amounts of polymer in the mixture, characteristic bands at 1241, 1279, 1342  $\text{cm}^{-1}$ , absent from the

$\beta$ CD signal, become stronger. The behaviour observed is very similar for both  $\beta$ CD derivatives. Overall, when gradually adding polymer to  $\beta$ CD, the IR spectra change smoothly from showing characteristic bands of  $\beta$ CD to revealing bands characteristic of the polymer. FTIR does not enable us to establish a clear difference between the complexing behaviour of hep2,6- $\beta$ CD and hep2,3,6- $\beta$ CD with Pluronics, despite the very different effect they had on the Pluronic micelles. Although FTIR measurements have been used by other groups to confirm the formation of host-guest interactions between  $\alpha$ -cyclodextrin and PEO [1-3], our measurements do show major shifts in the spectra that could point to a different type of interaction between the two  $\beta$ CD derivatives. The data suggest that some form of interaction takes place between the Pluronic and all  $\beta$ CDs, but this interaction cannot be quantified.

### References

- [1] Rusa, C. C.; Fox, J.; Tonelli, A. E., *Macromolecules*, 2003, **36**, 2742-2747
- [2] Rusa, C. C.; Luca, C.; Tonelli, A. E., *Macromolecules*, 2001, **33**, 1318-1322
- [3] Rusa, C. C. & Tonelli, A. E., *Macromolecules*, 2000, **33**, 1813-1818

### Figures

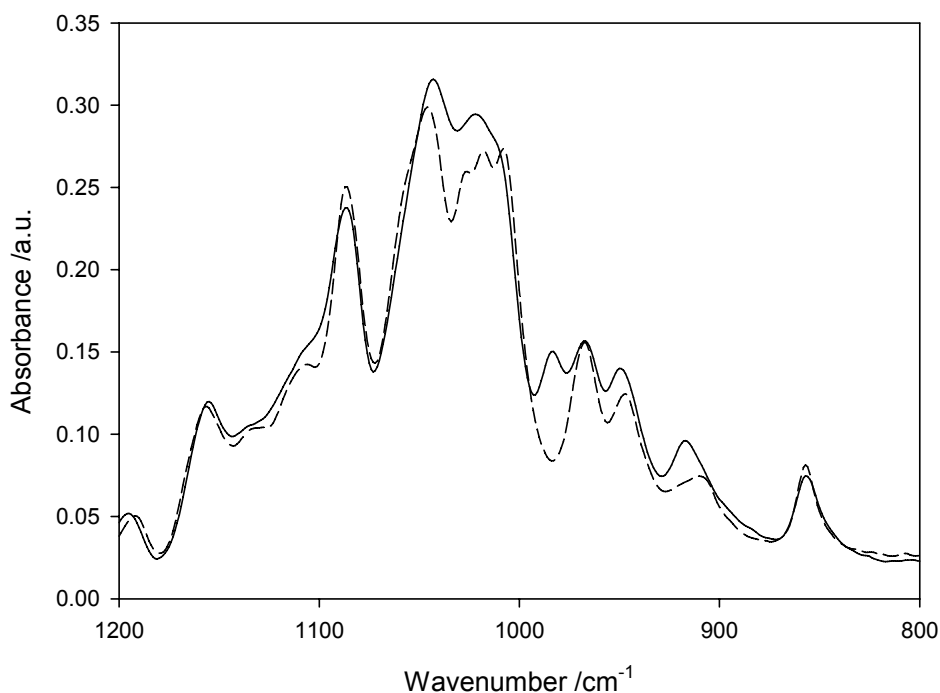

**Fig. 1.** Compared FTIR spectra of hep2,6- $\beta$ CD in D<sub>2</sub>O (full line) and H<sub>2</sub>O (dashed line).

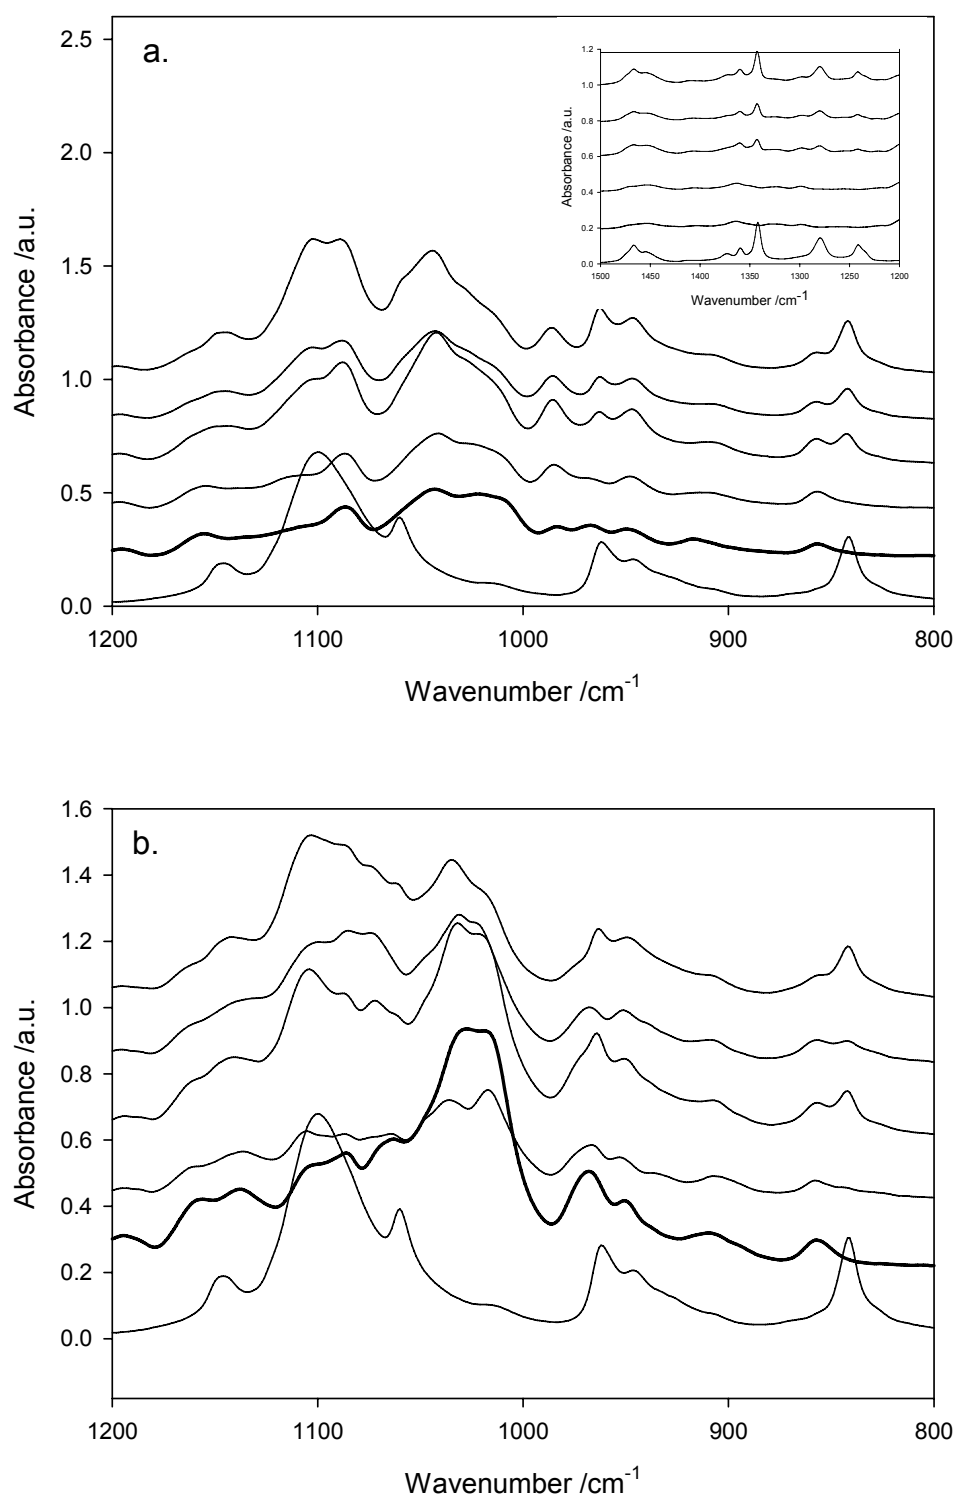

**Fig. 2** a) FTIR spectra of solutions of F127 (bottom) and hep2,6-βCD (thick line) with increasing concentrations of F127, corresponding to PO/βCD ratios of: 1.4 ( ), 4.1 ( ), 6.9 ( ), 9.6 ( ) and 12.4 ( ). Each curve has been shifted by 0.2 with respect to the previous. Inset: close up on the 1200 to 1500 cm<sup>-1</sup> region. b) FTIR spectra of F127 (bottom) and hep2,3,6-βCD (thick line) with increasing concentrations of F127, corresponding to PO/βCD ratios of: 1.5, 4.4, 7.4, 10.3 and 13.3 (all curves shifted).

### Wide Angle X-ray Scattering (WAXS)

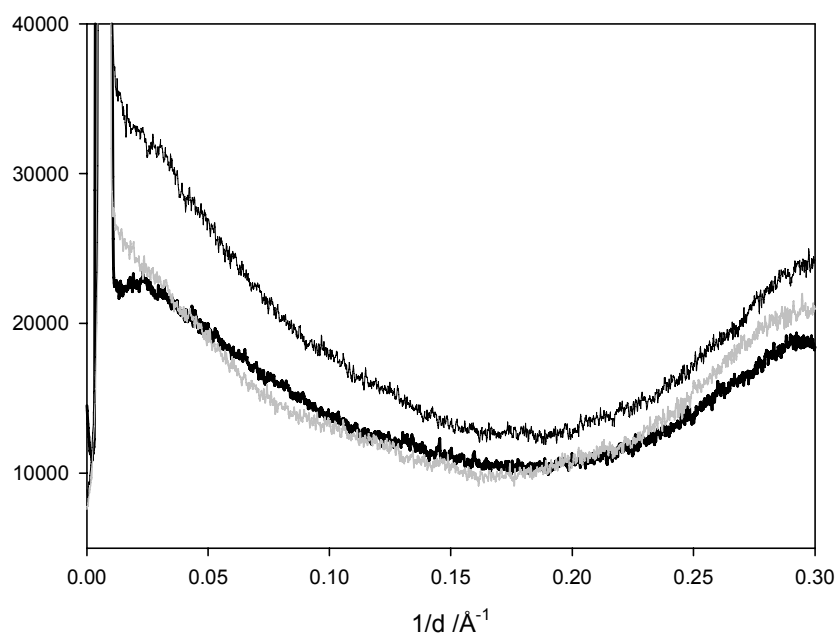

**Fig. 3.** WAXS signal from solutions of F127 (thick black line), hep2,6- $\beta$ CD (grey line) and hep2,3,6- $\beta$ CD (thin black line).
